# Supplementary material for: Optimizing the Compaction Characteristics and Strength Properties of Gravelly Soils in terms of Fine Contents
Source: Hindawi journal article supplement (doi:10.1155/2021/6634237), 2021-01-01
Supplement: f1 [file 6634237.f1.pdf]

## Data used to support the findings of the study

### 1. Raw data for grain size distribution of coarse-grained portion

| Grain size (mm) | Percent passing by weight (%) |
|-----------------|-------------------------------|
| 30              | 100                           |
| 20              | 73.7                          |
| 10              | 57.9                          |
| 5               | 42.1                          |
| 2               | 26.3                          |
| 0.075           | 0                             |

### 2. Raw data for grain size distribution of fine-grained portion

| Particle size (mm) | Percent passing by weight (%) |
|--------------------|-------------------------------|
| 0.075              | 100                           |
| 0.057              | 82.6                          |
| 0.026              | 77.1                          |
| 0.011              | 68.9                          |
| 0.006              | 37.2                          |
| 0.002              | 8.2                           |

### 3. Compaction curves for graded gravel sample with 5% fine contents

| Moisture content (%) | Saturation degree (%) | Dry density (g/cm <sup>3</sup> ) |
|----------------------|-----------------------|----------------------------------|
| 1.42                 | 17.18                 | 2.24                             |
| 2.88                 | 39.43                 | 2.29                             |
| 3.20                 | 47.40                 | 2.32                             |
| 4.57                 | 76.08                 | 2.36                             |
| 4.88                 | 89.06                 | 2.39                             |
| 6.01                 | 97.13                 | 2.35                             |

### 4. Compaction curves for graded gravel sample with 10% fine contents

| Moisture content (%) | Saturation degree (%) | Dry density (g/cm <sup>3</sup> ) |
|----------------------|-----------------------|----------------------------------|
| 1.38                 | 19.98                 | 2.31                             |
| 2.88                 | 47.93                 | 2.36                             |
| 3.07                 | 56.09                 | 2.39                             |
| 4.53                 | 98.01                 | 2.44                             |
| 5.14                 | 93.77                 | 2.39                             |
| 5.26                 | 99.11                 | 2.40                             |

5. Compaction curves for graded gravel sample with 20% fine contents

| Moisture content (%) | Saturation degree (%) | Dry density (g/cm <sup>3</sup> ) |
|----------------------|-----------------------|----------------------------------|
| 1.56                 | 19.31                 | 2.25                             |
| 3.52                 | 50.82                 | 2.31                             |
| 3.69                 | 56.29                 | 2.33                             |
| 5.49                 | 88.70                 | 2.35                             |
| 5.63                 | 96.56                 | 2.37                             |
| 6.84                 | 94.88                 | 2.30                             |

6. Compaction curves for graded gravel sample with 30% fine contents

| Moisture content (%) | Saturation degree (%) | Dry density (g/cm <sup>3</sup> ) |
|----------------------|-----------------------|----------------------------------|
| 1.59                 | 18.75                 | 2.23                             |
| 3.26                 | 39.38                 | 2.24                             |
| 3.42                 | 42.32                 | 2.25                             |
| 5.83                 | 77.77                 | 2.28                             |
| 5.92                 | 76.99                 | 2.27                             |
| 7.16                 | 84.44                 | 2.23                             |

7. Compaction curves for graded gravel sample with 40% fine contents

| Moisture content (%) | Saturation degree (%) | Dry density (g/cm <sup>3</sup> ) |
|----------------------|-----------------------|----------------------------------|
| 1.47                 | 12.55                 | 2.08                             |
| 1.88                 | 16.70                 | 2.10                             |
| 3.49                 | 35.14                 | 2.16                             |
| 5.20                 | 58.52                 | 2.21                             |
| 5.75                 | 66.23                 | 2.22                             |
| 7.20                 | 86.96                 | 2.24                             |
| 8.86                 | 93.19                 | 2.18                             |

8. Compaction curves for graded gravel sample with 50% fine contents

| Moisture content (%) | Saturation degree (%) | Dry density (g/cm <sup>3</sup> ) |
|----------------------|-----------------------|----------------------------------|
| 1.36                 | 7.69                  | 1.85                             |
| 3.40                 | 26.86                 | 2.04                             |
| 5.57                 | 48.51                 | 2.09                             |
| 7.76                 | 74.86                 | 2.14                             |
| 7.83                 | 78.83                 | 2.16                             |
| 9.65                 | 82.39                 | 2.08                             |
| 11.41                | 90.16                 | 2.04                             |

9. The relationship between  $S_r-S_{ropt}$  and  $\rho_d/\rho_{dmax}$  for graded gravel samples

| 5% fine content  |                      | 10% fine content |                      | 20% fine content |                      |
|------------------|----------------------|------------------|----------------------|------------------|----------------------|
| $S_r-S_{ropt}$   | $\rho_d/\rho_{dmax}$ | $S_r-S_{ropt}$   | $\rho_d/\rho_{dmax}$ | $S_r-S_{ropt}$   | $\rho_d/\rho_{dmax}$ |
| -71.82           | 0.94                 | -75.02           | 0.95                 | -66.70           | 0.95                 |
| -49.57           | 0.96                 | -47.07           | 0.97                 | -35.18           | 0.97                 |
| -41.60           | 0.97                 | -38.91           | 0.98                 | -29.71           | 0.98                 |
| -12.92           | 0.99                 | 3.01             | 1.00                 | 2.70             | 0.99                 |
| 0.06             | 1.00                 | -1.23            | 0.98                 | 10.56            | 1.00                 |
| 8.13             | 0.99                 | 4.11             | 0.98                 | 8.88             | 0.97                 |
| 30% fine content |                      | 40% fine content |                      | 50% fine content |                      |
| $S_r-S_{ropt}$   | $\rho_d/\rho_{dmax}$ | $S_r-S_{ropt}$   | $\rho_d/\rho_{dmax}$ | $S_r-S_{ropt}$   | $\rho_d/\rho_{dmax}$ |
| -61.25           | 0.98                 | -66.45           | 0.92                 | -70.31           | 0.86                 |
| -40.62           | 0.98                 | -62.30           | 0.93                 | -51.14           | 0.94                 |
| -37.68           | 0.99                 | -43.86           | 0.96                 | -29.49           | 0.97                 |
| -2.23            | 1.00                 | -20.48           | 0.98                 | -3.14            | 0.99                 |
| -3.01            | 1.00                 | -12.77           | 0.98                 | 0.83             | 1.00                 |
| 4.44             | 0.98                 | 7.96             | 0.99                 | 4.39             | 0.96                 |
| /                | /                    | 14.19            | 0.96                 | 12.16            | 0.94                 |

10. The relationship between deviatoric stress and axial strain for SWC graded gravels under the confining pressure of 20kPa

| 5% fine content  |                         | 10% fine content |                         | 20% fine content |                         |
|------------------|-------------------------|------------------|-------------------------|------------------|-------------------------|
| Axial strain (%) | Deviatoric stress (kPa) | Axial strain (%) | Deviatoric stress (kPa) | Axial strain (%) | Deviatoric stress (kPa) |
| 0                | 0                       | 0                | 0                       | 0                | 0                       |
| 0.1319           | 27.5287                 | 0.2479           | 42.2828                 | 0.1326           | 41.4422                 |
| 0.3056           | 89.9982                 | 0.4948           | 90.4939                 | 0.3057           | 129.9549                |
| 0.4707           | 149.683                 | 0.7513           | 157.5572                | 0.4713           | 235.6372                |
| 0.6369           | 206.8507                | 0.9981           | 239.1454                | 0.6359           | 323.3428                |
| 0.802            | 249.2198                | 1.2461           | 316.9282                | 0.8004           | 368.1182                |
| 0.9682           | 287.1688                | 1.5015           | 381.0536                | 0.8828           | 377.3107                |
| 1.1419           | 314.7253                | 1.7494           | 425.8073                | 0.9661           | 375.0265                |
| 1.3081           | 337.7999                | 1.9973           | 461.6169                | 1.3871           | 347.1929                |
| 1.4732           | 352.2406                | 2.2442           | 483.073                 | 1.7986           | 327.419                 |
| 1.6383           | 360.59                  | 2.4675           | 494.0898                | 2.2207           | 319.8257                |
| 1.8045           | 368.7096                | 2.7229           | 505.6177                | 2.6332           | 319.4217                |
| 1.9782           | 372.8282                | 2.9719           | 507.6507                | 3.02             | 316.5227                |
| 2.0607           | 370.7266                | 3.2177           | 514.3367                | 3.4411           | 311.0645                |
| 2.4746           | 368.8137                | 3.4667           | 518.76                  | 3.8536           | 307.8692                |
| 2.8638           | 354.5717                | 3.721            | 519.9663                | 4.2746           | 309.0608                |
| 3.2863           | 353.0281                | 3.97             | 522.7437                | 4.6871           | 304.8183                |
| 3.7001           | 352.1022                | 4.2169           | 518.4384                | 5.1082           | 305.2127                |

|         |          |         |          |         |          |
|---------|----------|---------|----------|---------|----------|
| 4.1225  | 341.8908 | 4.4723  | 520.4797 | 5.5207  | 300.2242 |
| 4.5364  | 337.5064 | 4.7202  | 521.1977 | 5.9075  | 300.0497 |
| 4.9589  | 329.3053 | 4.8036  | 527.2319 | 6.3296  | 299.041  |
| 5.3717  | 326.194  | 4.8859  | 524.4642 | 6.7411  | 296.4372 |
| 5.7609  | 330.5019 | 5.2738  | 516.4356 | 7.1621  | 302.059  |
| 6.1833  | 323.9725 | 5.6948  | 498.6959 | 7.5746  | 296.003  |
| 6.5972  | 330.408  | 6.1073  | 486.7802 | 7.9957  | 293.9045 |
| 7.0196  | 335.7147 | 6.5262  | 473.2231 | 8.4082  | 293.3818 |
| 7.4335  | 339.8576 | 6.9387  | 471.3135 | 8.7961  | 295.8126 |
| 7.8559  | 344.4864 | 7.3608  | 467.6737 | 9.2161  | 296.9486 |
| 8.2708  | 346.3385 | 7.7723  | 458.3133 | 9.6296  | 299.054  |
| 8.659   | 340.6953 | 8.1602  | 451.558  | 10.0507 | 299.0792 |
| 9.0803  | 336.8624 | 8.5823  | 443.5153 | 10.4631 | 300.3105 |
| 9.4953  | 338.8647 | 8.9948  | 444.8215 | 10.8842 | 299.2152 |
| 9.9167  | 339.8904 | 9.4159  | 432.8688 | 11.2956 | 300.8665 |
| 10.3305 | 333.9615 | 9.8284  | 427.7925 | 11.6835 | 300.4084 |
| 10.7529 | 327.8556 | 10.2473 | 418.2746 | 12.1046 | 301.9712 |
| 11.1668 | 324.2145 | 10.6608 | 411.5105 | 12.5171 | 303.0568 |
| 11.556  | 326.832  | 11.0477 | 399.5194 | 12.9381 | 305.1454 |
| 11.9784 | 320.3566 | 11.4687 | 393.3326 | 13.3506 | 304.4044 |
| 12.3913 | 318.4574 | 11.8812 | 387.5279 | 13.7717 | 296.5999 |
| 12.8148 | 314.8352 | 12.3023 | 385.6226 | 14.1842 | 301.1759 |
| 13.2286 | 312.7715 | 12.7158 | 384.196  | 14.5721 | 301.9917 |
| 13.65   | 308.1362 | 13.1369 | 385.6263 | 14.9921 | 301.7191 |
| 14.0639 | 307.3122 | 13.5483 | 382.3486 | /       | /        |
| 14.453  | 305.1413 | 13.9373 | 385.5343 | /       | /        |
| 14.8755 | 306.1833 | 14.3562 | 383.3614 | /       | /        |
| 14.958  | 306.1868 | 14.7687 | 382.0604 | /       | /        |

11. The relationship between deviatoric stress and axial strain for OWC graded gravels under the confining pressure of 20kPa

| 5% fine content  |                         | 10% fine content |                         | 20% fine content |                         |
|------------------|-------------------------|------------------|-------------------------|------------------|-------------------------|
| Axial strain (%) | Deviatoric stress (kPa) | Axial strain (%) | Deviatoric stress (kPa) | Axial strain (%) | Deviatoric stress (kPa) |
| 0                | 0                       | 0                | 0                       | 0                | 0                       |
| 0.1409           | 76.9718                 | 0.1405           | 42.7787                 | 0.1329           | 85.8937                 |
| 0.3066           | 132.343                 | 0.3056           | 111.6701                | 0.3227           | 180.2243                |
| 0.4723           | 156.262                 | 0.4707           | 173.3755                | 0.4889           | 215.8999                |
| 0.6465           | 181.9061                | 0.6369           | 242.5251                | 0.654            | 266.084                 |
| 0.8133           | 224.5654                | 0.8106           | 384.5965                | 0.7945           | 291.5484                |
| 0.9789           | 239.4951                | 0.9757           | 443.7796                | 0.9607           | 303.2296                |
| 1.1457           | 246.0288                | 1.1419           | 474.0711                | 1.1344           | 308.0203                |
| 1.3124           | 255.9953                | 1.307            | 528.1541                | 1.3006           | 314.071                 |

|         |          |         |          |         |          |
|---------|----------|---------|----------|---------|----------|
| 1.4856  | 268.6248 | 1.4732  | 581.8998 | 1.4657  | 320.5967 |
| 1.6524  | 272.5213 | 1.6469  | 603.1417 | 1.6308  | 323.1036 |
| 1.8191  | 276.0452 | 1.8131  | 618.2276 | 1.7144  | 323.5839 |
| 1.9848  | 272.296  | 1.9782  | 625.8737 | 1.797   | 321.4155 |
| 2.1504  | 277.9556 | 2.1433  | 630.3733 | 2.2183  | 317.4523 |
| 2.2913  | 274.6219 | 2.3095  | 632.1176 | 2.6322  | 309.5831 |
| 2.3742  | 280.2929 | 2.3674  | 631.7979 | 3.0547  | 305.7785 |
| 2.4581  | 280.0104 | 2.7898  | 607.5991 | 3.4685  | 295.6516 |
| 2.8809  | 272.1732 | 3.2026  | 575.8092 | 3.8577  | 289.8248 |
| 3.2961  | 270.5208 | 3.6251  | 563.384  | 4.2802  | 289.4767 |
| 3.7199  | 267.5206 | 4.04    | 527.8687 | 4.694   | 276.9424 |
| 4.1352  | 260.5729 | 4.4614  | 493.0393 | 5.1165  | 272.5821 |
| 4.559   | 256.0683 | 4.8752  | 470.5745 | 5.5303  | 271.5884 |
| 4.9743  | 249.9805 | 5.2644  | 443.464  | 5.9528  | 263.687  |
| 5.3734  | 241.3282 | 5.6858  | 430.3629 | 6.3666  | 260.4854 |
| 5.7886  | 238.6924 | 6.1007  | 432.8913 | 6.7558  | 262.0059 |
| 6.2114  | 240.2359 | 6.5221  | 423.7091 | 7.1772  | 255.8246 |
| 6.6277  | 237.1331 | 6.936   | 397.0883 | 7.5922  | 251.4412 |
| 7.0515  | 230.3355 | 7.3595  | 396.4085 | 8.0135  | 253.1481 |
| 7.4668  | 232.5104 | 7.7733  | 397.9036 | 8.4284  | 247.8646 |
| 7.8573  | 222.8576 | 8.1615  | 383.8581 | 8.8498  | 244.8295 |
| 8.28    | 220.0181 | 8.5839  | 385.2437 | 9.2637  | 248.0482 |
| 8.6953  | 211.0846 | 8.9978  | 383.3103 | 9.6529  | 248.5427 |
| 9.1191  | 208.6725 | 9.4202  | 376.3067 | 10.0753 | 248.4313 |
| 9.5344  | 203.3009 | 9.8341  | 360.887  | 10.4892 | 247.9226 |
| 9.9582  | 205.8747 | 10.2555 | 342.6116 | 10.9106 | 257.57   |
| 10.3734 | 209.4321 | 10.6693 | 329.4076 | 11.3255 | 252.9025 |
| 10.7629 | 205.4878 | 11.0596 | 328.959  | 11.7469 | 252.4185 |
| 11.1878 | 203.5603 | 11.481  | 340.6726 | 12.1607 | 254.7587 |
| 11.6019 | 203.0634 | 11.8948 | 341.3514 | 12.5499 | 249.0575 |
| 12.0258 | 204.1925 | 12.3173 | 345.3967 | 12.9724 | 248.3381 |
| 12.441  | 208.6556 | 12.7311 | 357.9114 | 13.3862 | 248.6964 |
| 12.8649 | 204.7688 | 13.1536 | 352.5302 | 13.8087 | 250.0671 |
| 13.2801 | 206.5696 | 13.6328 | 343.4541 | 14.2225 | 246.2049 |
| 13.6706 | 208.006  | 14.0639 | 349.923  | 14.6439 | 251.4592 |
| 14.0945 | 210.3083 | 14.4777 | 343.8201 | 14.9752 | 249.7886 |
| 14.5097 | 205.9861 | 14.8916 | 340.9421 | /       | /        |
| 14.9335 | 206.5661 | 14.9495 | 341.9286 | /       | /        |

12. The relationship between deviatoric stress and axial strain for SWC graded gravels under the confining pressure of 40kPa

| 5% fine content  |                         | 10% fine content |                         | 20% fine content |                         |
|------------------|-------------------------|------------------|-------------------------|------------------|-------------------------|
| Axial strain (%) | Deviatoric stress (kPa) | Axial strain (%) | Deviatoric stress (kPa) | Axial strain (%) | Deviatoric stress (kPa) |
| 0                | 0                       | 0                | 0                       | 0                | 0                       |
| 0.1646           | 40.3124                 | 0.2546           | 77.7473                 | 0.1319           | 42.2293                 |
| 0.3302           | 129.8246                | 0.5017           | 162.6165                | 0.2981           | 158.1748                |
| 0.5023           | 228.6958                | 0.7488           | 257.8042                | 0.4718           | 318.278                 |
| 0.6679           | 300.4941                | 0.9948           | 347.719                 | 0.6369           | 447.1615                |
| 0.8336           | 356.8009                | 1.2494           | 431.3935                | 0.8031           | 514.1288                |
| 0.9981           | 397.5407                | 1.4965           | 492.6825                | 0.9682           | 533.4834                |
| 1.1627           | 429.8908                | 1.7447           | 539.7244                | 1.1344           | 536.4387                |
| 1.3369           | 449.7941                | 1.9982           | 564.8242                | 1.2244           | 534.4553                |
| 1.5014           | 466.8824                | 2.2453           | 580.8596                | 1.6383           | 519.0157                |
| 1.666            | 476.5958                | 2.4913           | 590.7509                | 2.0532           | 499.3157                |
| 1.8327           | 485.3227                | 2.7384           | 597.4271                | 2.4746           | 483.4365                |
| 1.915            | 487.3444                | 2.9611           | 599.6895                | 2.8885           | 476.566                 |
| 1.9962           | 485.3996                | 3.2156           | 600.4204                | 3.2863           | 464.0824                |
| 2.3938           | 481.6844                | 3.4627           | 598.7408                | 3.7012           | 461.2124                |
| 2.8063           | 468.32                  | 3.6278           | 602.8375                | 4.1225           | 441.2317                |
| 3.2177           | 450.0567                | 3.7088           | 593.8523                | 4.5364           | 431.5983                |
| 3.6387           | 431.2087                | 4.1295           | 589.606                 | 4.9503           | 430.3059                |
| 4.0512           | 424.9765                | 4.5396           | 576.0627                | 5.3727           | 423.9794                |
| 4.4712           | 415.8954                | 4.9603           | 569.389                 | 5.7866           | 420.5998                |
| 4.8848           | 411.1387                | 5.3715           | 561.9912                | 6.1833           | 413.65                  |
| 5.2802           | 414.2089                | 5.7581           | 546.8121                | 6.5972           | 411.2145                |
| 5.6927           | 417.9708                | 6.1756           | 534.5166                | 7.0196           | 404.3157                |
| 6.1052           | 397.1692                | 6.5868           | 530.8929                | 7.4335           | 398.5768                |
| 6.5262           | 394.329                 | 7.0064           | 522.5812                | 7.8473           | 397.635                 |
| 6.9387           | 396.0042                | 7.4176           | 519.0925                | 8.2698           | 391.6778                |
| 7.3598           | 389.5082                | 7.8372           | 514.9251                | 8.6836           | 389.6297                |
| 7.7723           | 384.1204                | 8.2484           | 513.5025                | 9.0803           | 385.9181                |
| 8.1677           | 381.6191                | 8.6361           | 512.9548                | 9.4942           | 385.6201                |
| 8.5802           | 369.1049                | 9.0547           | 510.0927                | 9.9167           | 376.8404                |
| 8.9927           | 368.6202                | 9.4669           | 501.7349                | 10.3305          | 373.1159                |
| 9.4137           | 357.5483                | 9.8844           | 498.2296                | 10.7444          | 369.7657                |
| 9.8262           | 358.0928                | 10.2966          | 501.1305                | 11.1668          | 364.9986                |
| 10.2473          | 353.8554                | 10.7152          | 498.1078                | 11.5807          | 362.63                  |
| 10.6598          | 352.0791                | 11.1264          | 501.3496                | 11.9784          | 362.6922                |
| 11.0562          | 353.7334                | 11.513           | 492.2695                | 12.3923          | 361.5624                |
| 11.4698          | 350.997                 | 11.9327          | 481.909                 | 12.8148          | 356.2901                |

|         |          |         |          |         |          |
|---------|----------|---------|----------|---------|----------|
| 11.8802 | 342.4395 | 12.3449 | 482.7162 | 13.2286 | 353.7176 |
| 12.3023 | 340.4277 | 12.7635 | 476.3433 | 13.6425 | 353.779  |
| 12.7148 | 338.4102 | 13.1757 | 473.7423 | 14.0639 | 351.7084 |
| 13.1347 | 338.3026 | 13.5953 | 474.0714 | 14.4777 | 351.3133 |
| 13.5473 | 338.5983 | 14.0054 | 462.6828 | 14.8755 | 349.8943 |
| 13.9437 | 337.6388 | 14.3921 | 467.4442 | 14.958  | 348.4305 |
| 14.3562 | 329.4148 | 14.8106 | 472.5335 | /       | /        |
| 14.7687 | 323.5802 | 14.8927 | 470.8703 | /       | /        |
| 14.9418 | 323.2198 | /       | /        | /       | /        |

13. The relationship between deviatoric stress and axial strain for OWC graded gravels under the confining pressure of 40kPa

| 5% fine content  |                         | 10% fine content |                         | 20% fine content |                         |
|------------------|-------------------------|------------------|-------------------------|------------------|-------------------------|
| Axial strain (%) | Deviatoric stress (kPa) | Axial strain (%) | Deviatoric stress (kPa) | Axial strain (%) | Deviatoric stress (kPa) |
| 0                | 0                       | 0                | 0                       | 0                | 0                       |
| 0.142            | 31.4395                 | 0.1651           | 40.314                  | 0.1383           | 59.2312                 |
| 0.3066           | 110.2521                | 0.3313           | 98.3033                 | 0.3034           | 129.94                  |
| 0.4809           | 160.3905                | 0.4964           | 252.7409                | 0.4782           | 210.8835                |
| 0.6465           | 239.7271                | 0.6615           | 357.4434                | 0.6433           | 340.8348                |
| 0.8133           | 268.3324                | 0.8352           | 432.2499                | 0.8084           | 379.3539                |
| 0.98             | 301.9181                | 1.0014           | 491.739                 | 0.9735           | 398.943                 |
| 1.1457           | 313.9609                | 1.1665           | 590.3577                | 1.1397           | 415.4864                |
| 1.3199           | 337.1608                | 1.3327           | 635.8521                | 1.3134           | 429.5312                |
| 1.4856           | 348.0489                | 1.4978           | 668.5857                | 1.4796           | 432.7663                |
| 1.6524           | 359.2471                | 1.664            | 703.6847                | 1.6447           | 433.694                 |
| 1.818            | 360.8824                | 1.8366           | 727.3318                | 1.7273           | 431.8304                |
| 1.9848           | 370.4205                | 2.0028           | 740.8792                | 2.1165           | 425.285                 |
| 2.1257           | 374.2096                | 2.169            | 745.0606                | 2.5389           | 408.2171                |
| 2.2924           | 379.2819                | 2.2527           | 752.2419                | 2.9528           | 401.3418                |
| 2.4656           | 374.3992                | 2.3342           | 741.132                 | 3.3741           | 384.9426                |
| 2.6324           | 373.3657                | 2.7223           | 740.592                 | 3.788            | 376.1405                |
| 2.7991           | 379.9327                | 3.1458           | 719.5153                | 4.2115           | 368.0034                |
| 2.8819           | 382.3146                | 3.5586           | 685.3983                | 4.6243           | 365.7854                |
| 2.9648           | 379.6744                | 3.9821           | 676.6457                | 5.0146           | 361.1922                |
| 3.3875           | 366.1012                | 4.396            | 642.2709                | 5.436            | 359.921                 |
| 3.8039           | 357.1485                | 4.8173           | 617.3711                | 5.8498           | 353.513                 |
| 4.2277           | 357.5679                | 5.2312           | 601.7315                | 6.2722           | 345.772                 |
| 4.6419           | 353.5532                | 5.6204           | 578.1389                | 6.6861           | 340.7736                |
| 5.0334           | 343.8067                | 6.0428           | 566.6998                | 7.1075           | 340.6513                |
| 5.4562           | 335.6049                | 6.4567           | 566.5608                | 7.5214           | 338.3844                |
| 5.8714           | 334.3199                | 6.8792           | 548.3457                | 7.9106           | 333.9109                |
| 6.2953           | 322.7765                | 7.293            | 526.6604                | 8.333            | 337.2772                |

|         |          |         |          |         |          |
|---------|----------|---------|----------|---------|----------|
| 6.7105  | 309.8871 | 7.7154  | 527.6168 | 8.7479  | 334.8232 |
| 7.1344  | 313.7134 | 8.1282  | 512.0009 | 9.1693  | 328.2378 |
| 7.5485  | 300.3403 | 8.5174  | 503.7115 | 9.5832  | 330.5635 |
| 7.9401  | 297.5761 | 8.9399  | 501.1924 | 10.0056 | 325.304  |
| 8.3629  | 295.8801 | 9.3538  | 478.6303 | 10.4195 | 321.847  |
| 8.7781  | 288.5188 | 9.7762  | 471.4592 | 10.8087 | 325.8979 |
| 9.202   | 280.0293 | 10.19   | 469.3792 | 11.2301 | 321.1081 |
| 9.6172  | 287.0124 | 10.6114 | 465.9468 | 11.6439 | 320.8663 |
| 10.041  | 279.2296 | 11.0253 | 454.6826 | 12.0663 | 324.302  |
| 10.4563 | 277.1645 | 11.4166 | 459.6746 | 12.4802 | 323.1775 |
| 10.8468 | 283.3341 | 11.838  | 437.8413 | 12.9026 | 319.4897 |
| 11.2706 | 282.5265 | 12.2508 | 435.7418 | 13.3176 | 321.325  |
| 11.6848 | 273.8551 | 12.6732 | 435.4051 | 13.7057 | 313.8659 |
| 12.1086 | 277.4483 | 13.0871 | 451.3193 | 14.1282 | 308.1718 |
| 12.5239 | 264.3683 | 13.5096 | 432.5534 | 14.542  | 309.3903 |
| 12.9477 | 257.0761 | 13.9234 | 431.8094 | 14.9645 | 303.6115 |
| 13.3629 | 265.0442 | 14.3126 | 436.0622 | /       | /        |
| 13.7534 | 265.6838 | 14.734  | 432.8892 | /       | /        |
| 14.1773 | 262.3779 | 14.9001 | 435.4555 | /       | /        |
| 14.5925 | 258.5036 | /       | /        | /       | /        |
| 15.0163 | 260.2463 | /       | /        | /       | /        |

14. The relationship between deviatoric stress and axial strain for SWC graded gravels under the confining pressure of 60kPa

| 5% fine content  |                         | 10% fine content |                         | 20% fine content |                         |
|------------------|-------------------------|------------------|-------------------------|------------------|-------------------------|
| Axial strain (%) | Deviatoric stress (kPa) | Axial strain (%) | Deviatoric stress (kPa) | Axial strain (%) | Deviatoric stress (kPa) |
| 0                | 0                       | 0                | 0                       | 0                | 0                       |
| 0.1651           | 72.6465                 | 0.164            | 42.9999                 | 0.1315           | 47.3855                 |
| 0.3313           | 177.9024                | 0.328            | 93.4698                 | 0.296            | 174.793                 |
| 0.4964           | 283.2252                | 0.4931           | 144.6356                | 0.4702           | 337.7392                |
| 0.6615           | 369.1364                | 0.6572           | 201.4109                | 0.6348           | 464.3784                |
| 0.8363           | 441.292                 | 0.8308           | 271.4718                | 0.8004           | 549.8062                |
| 1.0014           | 489.114                 | 0.9948           | 343.1736                | 0.965            | 590.1194                |
| 1.1665           | 520.7874                | 1.1588           | 418.8868                | 1.1306           | 604.5013                |
| 1.3327           | 548.6287                | 1.3229           | 489.7056                | 1.2129           | 605.6498                |
| 1.4978           | 567.6061                | 1.488            | 556.7365                | 1.3038           | 605.0369                |
| 1.664            | 581.6033                | 1.6605           | 612.3                   | 1.7162           | 585.7397                |
| 1.8388           | 592.306                 | 1.8256           | 661.5524                | 2.1373           | 559.6942                |
| 2.0028           | 589.327                 | 1.9897           | 698.8925                | 2.5498           | 544.0539                |
| 2.169            | 593.3031                | 2.1548           | 733.3129                | 2.9366           | 530.6879                |
| 2.2516           | 598.2244                | 2.3188           | 758.8254                | 3.3577           | 522.3695                |
| 2.3341           | 597.8697                | 2.4828           | 778.0797                | 3.7702           | 521.2094                |



|         |          |         |          |         |          |
|---------|----------|---------|----------|---------|----------|
| 2.7233  | 591.2728 | 2.6234  | 784.4539 | 4.1912  | 516.6472 |
| 3.1458  | 573.9257 | 2.797   | 791.5133 | 4.6037  | 512.7337 |
| 3.5596  | 562.0486 | 2.878   | 783.579  | 5.0258  | 510.273  |
| 3.9821  | 555.5779 | 3.2891  | 783.0034 | 5.4384  | 511.2706 |
| 4.3959  | 542.1386 | 3.7098  | 770.5749 | 5.8252  | 507.2637 |
| 4.8184  | 529.5728 | 4.121   | 757.5369 | 6.2452  | 506.713  |
| 5.2322  | 527.6053 | 4.5406  | 746.6794 | 6.6577  | 503.3496 |
| 5.6204  | 517.9544 | 4.9518  | 735.4304 | 7.0787  | 499.7609 |
| 6.0428  | 487.4229 | 5.3629  | 710.2117 | 7.4912  | 498.9508 |
| 6.4578  | 486.701  | 5.757   | 693.6609 | 7.9123  | 495.2333 |
| 6.8791  | 468.9168 | 6.1682  | 675.8211 | 8.3258  | 495.8873 |
| 7.293   | 459.0071 | 6.5868  | 666.0898 | 8.7127  | 492.0832 |
| 7.7154  | 455.689  | 6.9979  | 656.0936 | 9.1348  | 488.244  |
| 8.1293  | 445.0417 | 7.4176  | 647.6021 | 9.5462  | 480.6751 |
| 8.5185  | 437.1028 | 7.8298  | 640.4265 | 9.9662  | 478.3047 |
| 8.9398  | 428.0963 | 8.2409  | 624.3354 | 10.3798 | 476.5178 |
| 9.3537  | 426.2913 | 8.635   | 612.4474 | 10.7997 | 475.0532 |
| 9.7762  | 427.4686 | 9.0461  | 596.7173 | 11.2122 | 477.0811 |
| 10.19   | 421.0297 | 9.4648  | 587.2729 | 11.6002 | 478.1781 |
| 10.6125 | 411.1779 | 9.8759  | 583.2375 | 12.0212 | 472.8252 |
| 11.0263 | 407.0117 | 10.2955 | 573.0729 | 12.4337 | 477.9662 |
| 11.4155 | 410.3177 | 10.7067 | 566.5152 | 12.8548 | 473.0648 |
| 11.839  | 411.7654 | 11.1178 | 561.1173 | 13.2673 | 478.6901 |
| 12.2518 | 403.8109 | 11.513  | 557.4108 | 13.6883 | 480.0764 |
| 12.6732 | 396.4032 | 11.9241 | 552.814  | 14.1008 | 480.4831 |
| 13.0871 | 394.3484 | 12.3438 | 543.5657 | 14.4887 | 483.8136 |
| 13.5095 | 392.0785 | 12.7549 | 533.1627 | 14.9087 | 479.6247 |
| 13.9234 | 396.9889 | 13.1746 | 526.2848 | 14.991  | 480.5843 |
| 14.3126 | 395.9322 | 13.5857 | 522.787  | /       | /        |
| 14.735  | 394.9323 | 13.9969 | 521.8205 | /       | /        |
| 14.9001 | 395.9028 | 14.391  | 516.5711 | /       | /        |
| /       | /        | 14.8021 | 516.0708 | /       | /        |
| /       | /        | 14.8841 | 518.1151 | /       | /        |

15. The relationship between deviatoric stress and axial strain for OWC graded gravels under the confining pressure of 60kPa

| 5% fine content  |                         | 10% fine content |                         | 20% fine content |                         |
|------------------|-------------------------|------------------|-------------------------|------------------|-------------------------|
| Axial strain (%) | Deviatoric stress (kPa) | Axial strain (%) | Deviatoric stress (kPa) | Axial strain (%) | Deviatoric stress (kPa) |
| 0                | 0                       | 0                | 0                       | 0                | 0                       |
| 0.1651           | 45.3606                 | 0.1405           | 50.8657                 | 0.1409           | 69.06                   |
| 0.3302           | 157.0633                | 0.3056           | 141.5057                | 0.3066           | 183.9525                |
| 0.4964           | 293.1462                | 0.4707           | 192.2253                | 0.4723           | 256.5216                |

|         |          |         |          |         |          |
|---------|----------|---------|----------|---------|----------|
| 0.6615  | 347.6728 | 0.6369  | 325.1387 | 0.639   | 374.5975 |
| 0.8363  | 388.5886 | 0.8031  | 447.0127 | 0.8133  | 485.494  |
| 1.0014  | 437.2423 | 0.9757  | 539.3575 | 0.98    | 536.0141 |
| 1.1665  | 476.9481 | 1.1419  | 589.3101 | 1.1457  | 550.977  |
| 1.3327  | 496.5737 | 1.307   | 702.9304 | 1.3113  | 574.5556 |
| 1.4978  | 514.1411 | 1.4732  | 756.2795 | 1.4781  | 583.5912 |
| 1.6715  | 526.6539 | 1.6383  | 784.4459 | 1.6524  | 588.2452 |
| 1.8377  | 538.364  | 1.8131  | 827.6999 | 1.7352  | 585.8058 |
| 2.0028  | 539.0874 | 1.9782  | 866.9114 | 2.1504  | 571.5081 |
| 2.169   | 547.5549 | 2.1433  | 888.444  | 2.5409  | 552.4005 |
| 2.2516  | 540.2872 | 2.3095  | 895.8401 | 2.9648  | 543.5483 |
| 2.6397  | 541.7782 | 2.3931  | 910.3517 | 3.38    | 522.4808 |
| 3.0632  | 533.141  | 2.4746  | 892.1049 | 3.8039  | 508.4606 |
| 3.476   | 516.1969 | 2.8638  | 898.7291 | 4.2202  | 505.0475 |
| 3.8995  | 515.5662 | 3.2863  | 879.6357 | 4.6419  | 492.9439 |
| 4.3123  | 499.8674 | 3.7001  | 849.4428 | 5.0571  | 484.2873 |
| 4.7347  | 493.3392 | 4.1225  | 842.9016 | 5.4487  | 480.6624 |
| 5.1486  | 488.1335 | 4.5353  | 803.5444 | 5.8714  | 476.4123 |
| 5.5378  | 479.1096 | 4.9578  | 779.5865 | 6.2867  | 467.3655 |
| 5.9592  | 473.8402 | 5.3727  | 777.4245 | 6.7105  | 456.9123 |
| 6.3741  | 473.484  | 5.7609  | 752.3807 | 7.1257  | 466.1956 |
| 6.7966  | 466.0243 | 6.1833  | 720.3106 | 7.5496  | 460.8272 |
| 7.2093  | 453.8996 | 6.5972  | 715.1486 | 7.9649  | 455.4844 |
| 7.6328  | 457.0102 | 7.0196  | 699.1984 | 8.3553  | 463.371  |
| 8.0467  | 444.1117 | 7.4335  | 677.9472 | 8.7781  | 453.2242 |
| 8.4359  | 435.7917 | 7.8559  | 669.5329 | 9.1934  | 445.7202 |
| 8.8573  | 435.1469 | 8.2698  | 662.6272 | 9.6172  | 451.3491 |
| 9.2712  | 424.9493 | 8.6579  | 654.5482 | 10.0324 | 448.1782 |
| 9.6936  | 416.2954 | 9.0814  | 650.1774 | 10.4563 | 440.3364 |
| 10.1074 | 411.8087 | 9.4942  | 639.8479 | 10.8715 | 440.4255 |
| 10.5288 | 413.0794 | 9.9167  | 628.0151 | 11.262  | 439.306  |
| 10.9427 | 407.8853 | 10.3305 | 607.5971 | 11.6858 | 430.4769 |
| 11.3329 | 406.2552 | 10.7529 | 616.3474 | 12.1011 | 433.5437 |
| 11.7543 | 417.3348 | 11.1668 | 614.3015 | 12.5239 | 434.1226 |
| 12.1693 | 412.4481 | 11.556  | 598.8956 | 12.9391 | 434.4053 |
| 12.5906 | 408.4911 | 11.9774 | 600.4506 | 13.364  | 434.6174 |
| 13.0045 | 416.6435 | 12.3913 | 590.3058 | 13.7782 | 435.4702 |
| 13.427  | 416.1313 | 12.8137 | 570.9042 | 14.1687 | 436.6816 |
| 13.8408 | 418.4896 | 13.2275 | 564.1118 | 14.5925 | 431.9681 |
| 14.23   | 428.2903 | 13.65   | 553.9316 | 15.0077 | 434.2735 |
| 14.6514 | 428.1478 | 14.0639 | 544.7034 | /       | /        |
| 14.8175 | 428.3813 | 14.453  | 540.3779 | /       | /        |
| /       | /        | 14.8755 | 527.4902 | /       | /        |

|   |   |        |          |   |   |
|---|---|--------|----------|---|---|
| / | / | 14.958 | 527.0201 | / | / |
|---|---|--------|----------|---|---|

16. Optimum saturation degree plotted against FC for gravel samples

| Group 1          |                   | Group 2          |                   | Group 3          |                   | Group 4          |                   |
|------------------|-------------------|------------------|-------------------|------------------|-------------------|------------------|-------------------|
| Fine content (%) | $(S_r)_{opt}$ (%) |
| 5                | 89                | 2.5              | 93                | 6.4              | 83                | 4.0              | 87                |
| 10               | 95                | 5.7              | 95                | 1.3              | 70                | 4.0              | 86                |
| 20               | 86                | 8.6              | 93                | 17               | 80                | 4.0              | 86                |
| 30               | 80                | 25               | 91                | 17               | 76                | 14.2             | 89                |
| 40               | 79                | 26               | 88                | 4                | 94                | 14.2             | 85                |
| 50               | 78                | 37               | 85                | 9.3              | 78                | 14.2             | 85                |
| /                | /                 | /                | /                 | 18.6             | 73                | 14.2             | 83                |
| /                | /                 | /                | /                 | 18.7             | 84                | 14.2             | 83                |
| /                | /                 | /                | /                 | 8.8              | 87                | 14.2             | 84                |
| /                | /                 | /                | /                 | 8.3              | 76                | 14.2             | 84                |
| /                | /                 | /                | /                 | /                | /                 | 14.2             | 85                |

17. Grain size distribution for five soil types around Miboro dam site

| 1       |              | 2      |              | 3       |              |
|---------|--------------|--------|--------------|---------|--------------|
| D(mm)   | 小于某粒径颗粒含量百分比 | D(mm)  | 小于某粒径颗粒含量百分比 | D(mm)   | 小于某粒径颗粒含量百分比 |
| 181.072 | 80.10        | 74.482 | 98.81        | 120.122 | 99.17        |
| 153.773 | 77.20        | 64.001 | 97.31        | 96.994  | 97.20        |
| 132.636 | 74.40        | 53.725 | 95.13        | 72.181  | 94.92        |
| 115.292 | 71.04        | 45.098 | 92.64        | 55.413  | 93.16        |
| 106.654 | 68.86        | 38.896 | 88.96        | 44.741  | 90.41        |
| 93.074  | 66.37        | 33.419 | 85.91        | 39.505  | 88.65        |
| 81.540  | 63.89        | 31.520 | 82.90        | 37.410  | 87.62        |
| 65.834  | 60.62        | 28.373 | 79.38        | 35.565  | 86.68        |
| 57.004  | 57.36        | 25.940 | 76.01        | 32.522  | 85.70        |
| 50.131  | 54.15        | 24.847 | 72.07        | 26.465  | 83.73        |
| 43.407  | 50.83        | 21.266 | 69.02        | 21.037  | 80.00        |
| 35.874  | 48.13        | 18.702 | 66.01        | 16.919  | 76.74        |
| 30.943  | 45.34        | 16.704 | 62.44        | 14.147  | 74.09        |
| 26.689  | 42.38        | 15.154 | 59.02        | 12.014  | 70.98        |
| 22.667  | 40.31        | 13.694 | 55.65        | 9.776   | 68.08        |
| 18.806  | 37.62        | 12.327 | 52.38        | 8.048   | 65.13        |
| 14.777  | 34.35        | 10.758 | 49.84        | 6.677   | 61.87        |
| 12.500  | 31.24        | 9.498  | 46.68        | 5.370   | 58.76        |
| 10.616  | 29.12        | 7.879  | 43.11        | 4.403   | 54.72        |
| 8.808   | 26.68        | 6.823  | 40.26        | 3.541   | 51.30        |
| 7.112   | 24.20        | 5.977  | 37.56        | 2.996   | 47.98        |

|       |       |       |       |       |       |
|-------|-------|-------|-------|-------|-------|
| 5.855 | 21.71 | 4.845 | 35.08 | 2.514 | 45.23 |
| 4.357 | 19.27 | 4.083 | 32.33 | 2.144 | 42.44 |
| 3.384 | 17.41 | 3.335 | 30.10 | 1.772 | 39.17 |
| 2.588 | 15.54 | 2.778 | 27.41 | 1.470 | 36.53 |
| 1.994 | 13.73 | 2.323 | 24.92 | 1.205 | 33.63 |
| 1.502 | 12.54 | 1.935 | 23.37 | 0.992 | 31.14 |
| 1.199 | 10.57 | 1.532 | 20.98 | 0.839 | 28.19 |
| 0.935 | 9.64  | 1.232 | 18.96 | 0.673 | 25.34 |
| 0.755 | 8.50  | 0.942 | 17.20 | 0.560 | 22.69 |
| 0.605 | 7.46  | 0.752 | 15.39 | 0.461 | 19.84 |
| 0.492 | 6.99  | 0.580 | 13.42 | 0.365 | 17.93 |
| 0.365 | 6.11  | 0.456 | 12.23 | 0.304 | 15.96 |
| 0.283 | 5.08  | 0.343 | 10.83 | 0.251 | 13.99 |
| 0.223 | 4.72  | 0.269 | 9.74  | 0.190 | 12.38 |
| 0.177 | 4.35  | 0.205 | 8.65  | 0.141 | 10.62 |
| 0.141 | 3.94  | 0.160 | 7.77  | 0.105 | 9.74  |
| 0.108 | 3.58  | 0.122 | 7.20  | 0.078 | 8.86  |
| 0.080 | 2.69  | 0.095 | 6.48  | 0.059 | 8.03  |
| 0.063 | 2.33  | 0.074 | 5.70  | 0.044 | 7.62  |
| 0.049 | 2.07  | 0.057 | 5.08  | 0.033 | 6.53  |
| 0.039 | 1.61  | 0.042 | 4.72  | 0.024 | 5.49  |
| 0.030 | 1.66  | 0.032 | 4.40  | 0.017 | 4.72  |
| 0.024 | 1.66  | 0.023 | 3.73  | 0.012 | 4.51  |
| 0.017 | 1.24  | 0.016 | 3.26  | 0.009 | 4.25  |
| 0.014 | 1.24  | 0.012 | 3.16  | 0.007 | 3.68  |
| 0.010 | 1.19  | 0.009 | 2.80  | 0.005 | 3.58  |
| 0.008 | 0.93  | 0.007 | 2.33  | /     | /     |
| 0.006 | 0.62  | 0.005 | 1.87  | /     | /     |
| 0.005 | 0.41  | /     | /     | /     | /     |

| 4      |              | 5     |              |
|--------|--------------|-------|--------------|
| D(mm)  | 小于某粒径颗粒含量百分比 | D(mm) | 小于某粒径颗粒含量百分比 |
| 50.868 | 99.80        | 3.905 | 99.38        |
| 41.719 | 98.45        | 3.129 | 97.61        |
| 35.158 | 96.22        | 2.567 | 95.80        |
| 29.286 | 94.62        | 1.955 | 93.88        |
| 23.925 | 92.65        | 1.561 | 91.39        |
| 18.872 | 89.18        | 1.171 | 89.37        |
| 15.179 | 86.33        | 0.968 | 86.93        |
| 12.448 | 83.58        | 0.788 | 83.97        |
| 10.248 | 80.37        | 0.664 | 81.02        |
| 8.307  | 77.32        | 0.522 | 77.59        |

|       |       |       |       |
|-------|-------|-------|-------|
| 6.866 | 74.99 | 0.423 | 73.81 |
| 5.543 | 71.52 | 0.355 | 70.95 |
| 4.600 | 69.44 | 0.297 | 67.27 |
| 3.891 | 66.85 | 0.243 | 63.38 |
| 3.046 | 64.16 | 0.212 | 60.22 |
| 2.356 | 61.26 | 0.180 | 56.90 |
| 1.903 | 57.95 | 0.149 | 53.32 |
| 1.560 | 55.51 | 0.132 | 49.69 |
| 1.310 | 52.77 | 0.111 | 45.95 |
| 1.017 | 50.54 | 0.091 | 42.63 |
| 0.857 | 47.95 | 0.079 | 38.95 |
| 0.690 | 45.62 | 0.062 | 35.32 |
| 0.570 | 43.08 | 0.051 | 32.83 |
| 0.434 | 40.18 | 0.045 | 29.88 |
| 0.328 | 38.06 | 0.038 | 27.75 |
| 0.255 | 35.67 | 0.031 | 25.31 |
| 0.204 | 33.08 | 0.026 | 23.44 |
| 0.149 | 30.86 | 0.021 | 21.58 |
| 0.108 | 28.68 | 0.017 | 18.83 |
| 0.083 | 27.23 | 0.012 | 17.63 |
| 0.064 | 25.78 | 0.009 | 15.92 |
| /     | /     | 0.007 | 14.26 |
| /     | /     | 0.005 | 12.86 |
| /     | /     | 0.003 | 11.83 |
| /     | /     | 0.003 | 10.68 |

18. Compaction data for soil type 1

| 1       |           |                               |                  |                        |
|---------|-----------|-------------------------------|------------------|------------------------|
| $w$ (%) | $S_r$ (%) | $\rho_d$ (g/cm <sup>3</sup> ) | $S_r - S_{ropt}$ | $\rho_d / \rho_{dmax}$ |
| 4.22    | 22.29     | 1.765                         | -70.71           | 0.910                  |
| 4.88    | 24.80     | 1.741                         | -68.20           | 0.898                  |
| 6.71    | 35.94     | 1.773                         | -57.06           | 0.914                  |
| 7.18    | 41.23     | 1.813                         | -51.77           | 0.935                  |
| 8.64    | 52.16     | 1.842                         | -40.84           | 0.949                  |
| 10.53   | 65.83     | 1.861                         | -27.17           | 0.959                  |
| 11.17   | 75.44     | 1.903                         | -17.56           | 0.981                  |
| 11.94   | 85.96     | 1.937                         | -7.04            | 0.998                  |
| 14.20   | 96.41     | 1.906                         | 3.41             | 0.983                  |
| 17.23   | 96.31     | 1.798                         | 3.31             | 0.927                  |

19. Compaction data for soil type 2

| 2       |           |                               |                  |                        |
|---------|-----------|-------------------------------|------------------|------------------------|
| $w$ (%) | $S_r$ (%) | $\rho_d$ (g/cm <sup>3</sup> ) | $S_r - S_{ropt}$ | $\rho_d / \rho_{dmax}$ |

|       |       |       |        |       |
|-------|-------|-------|--------|-------|
| 4.11  | 28.18 | 1.911 | -66.82 | 0.901 |
| 6.31  | 51.64 | 2.002 | -43.36 | 0.944 |
| 6.75  | 58.84 | 2.032 | -36.16 | 0.959 |
| 7.42  | 70.73 | 2.074 | -24.27 | 0.978 |
| 7.89  | 76.28 | 2.080 | -18.72 | 0.981 |
| 8.73  | 91.32 | 2.114 | -3.68  | 0.997 |
| 10.16 | 97.13 | 2.075 | 2.13   | 0.979 |
| 11.26 | 96.67 | 2.025 | 1.67   | 0.955 |

20. Compaction data for soil type 3

| 3       |           |                               |                  |                        |
|---------|-----------|-------------------------------|------------------|------------------------|
| $w$ (%) | $S_r$ (%) | $\rho_d$ (g/cm <sup>3</sup> ) | $S_r - S_{ropt}$ | $\rho_d / \rho_{dmax}$ |
| 7.36    | 39.05     | 1.767                         | -53.95           | 0.911                  |
| 9.14    | 54.59     | 1.835                         | -38.41           | 0.946                  |
| 10.53   | 65.87     | 1.861                         | -27.13           | 0.959                  |
| 11.51   | 79.12     | 1.913                         | -13.88           | 0.986                  |
| 12.30   | 88.77     | 1.938                         | -4.23            | 0.999                  |
| 13.29   | 93.90     | 1.927                         | 0.90             | 0.993                  |
| 13.72   | 91.87     | 1.898                         | -1.13            | 0.979                  |

21. Compaction data for soil type 4

| 4       |           |                               |                  |                        |
|---------|-----------|-------------------------------|------------------|------------------------|
| $w$ (%) | $S_r$ (%) | $\rho_d$ (g/cm <sup>3</sup> ) | $S_r - S_{ropt}$ | $\rho_d / \rho_{dmax}$ |
| 6.04    | 20.34     | 1.483                         | -67.66           | 0.867                  |
| 7.03    | 23.83     | 1.487                         | -64.17           | 0.870                  |
| 9.49    | 33.34     | 1.511                         | -54.66           | 0.883                  |
| 11.42   | 42.07     | 1.542                         | -45.93           | 0.901                  |
| 14.32   | 58.69     | 1.609                         | -29.31           | 0.941                  |
| 15.38   | 63.91     | 1.618                         | -24.09           | 0.946                  |
| 15.08   | 65.68     | 1.648                         | -22.32           | 0.964                  |
| 16.68   | 75.20     | 1.669                         | -12.80           | 0.976                  |
| 17.08   | 78.32     | 1.679                         | -9.68            | 0.982                  |
| 18.03   | 85.92     | 1.703                         | -2.08            | 0.996                  |
| 18.88   | 89.25     | 1.698                         | 1.25             | 0.993                  |
| 19.62   | 88.06     | 1.666                         | 0.06             | 0.974                  |
| 20.47   | 91.31     | 1.662                         | 3.31             | 0.972                  |

22. Compaction data for soil type 5

| 5       |           |                               |                  |                        |
|---------|-----------|-------------------------------|------------------|------------------------|
| $w$ (%) | $S_r$ (%) | $\rho_d$ (g/cm <sup>3</sup> ) | $S_r - S_{ropt}$ | $\rho_d / \rho_{dmax}$ |
| 9.74    | 29.98     | 1.424                         | -55.02           | 0.885                  |
| 13.80   | 44.98     | 1.462                         | -40.02           | 0.908                  |
| 14.36   | 48.82     | 1.489                         | -36.18           | 0.925                  |

|       |       |       |        |       |
|-------|-------|-------|--------|-------|
| 15.92 | 55.36 | 1.504 | -29.64 | 0.934 |
| 17.75 | 65.33 | 1.541 | -19.67 | 0.957 |
| 19.60 | 78.47 | 1.594 | -6.53  | 0.990 |
| 20.60 | 84.18 | 1.608 | -0.82  | 0.999 |
| 22.11 | 87.76 | 1.589 | 2.76   | 0.987 |
| 22.92 | 87.20 | 1.562 | 2.20   | 0.970 |
| 24.80 | 89.11 | 1.525 | 4.11   | 0.947 |

23. Grading curves for core material and sieved core material of Miboro dam site

| Raw material  |                               | Seived material |                               |
|---------------|-------------------------------|-----------------|-------------------------------|
| Diameter (mm) | Percent passing by weight (%) | Diameter (mm)   | Percent passing by weight (%) |
| 140.13        | 99.55                         | 4.733           | 99.90                         |
| 118.39        | 97.62                         | 4.402           | 97.95                         |
| 88.29         | 94.38                         | 3.584           | 92.19                         |
| 65.60         | 91.11                         | 2.771           | 83.89                         |
| 57.81         | 89.47                         | 2.143           | 75.28                         |
| 39.99         | 83.29                         | 1.544           | 65.72                         |
| 26.00         | 74.77                         | 1.041           | 54.88                         |
| 15.88         | 65.22                         | 0.713           | 45.35                         |
| 9.91          | 56.31                         | 0.510           | 36.98                         |
| 5.34          | 44.88                         | 0.355           | 29.88                         |
| 3.48          | 37.31                         | 0.245           | 23.99                         |
| 1.71          | 27.00                         | 0.166           | 20.18                         |
| 0.79          | 17.95                         | 0.118           | 17.20                         |
| 0.52          | 13.31                         | 0.069           | 13.84                         |
| 0.27          | 9.15                          | 0.034           | 11.03                         |
| 0.15          | 6.10                          | 0.015           | 8.26                          |
| 0.08          | 4.12                          | 0.008           | 6.85                          |
| 0.05          | 3.67                          | 0.004           | 6.44                          |
| 0.03          | 3.75                          | /               | /                             |

24. Field compaction curves for core material and sieved core material of Miboro dam site

| N=16  |           |                               |                     |                           |
|-------|-----------|-------------------------------|---------------------|---------------------------|
| w (%) | $S_r$ (%) | $\rho_d$ (g/cm <sup>3</sup> ) | $S_r - (S_r)_{opt}$ | $\rho_d / (\rho_d)_{max}$ |
| 7.16  | 73.28     | 2.105                         | -13.72              | 0.98                      |
| 7.48  | 80.42     | 2.126                         | -6.58               | 0.99                      |
| 7.98  | 87.46     | 2.134                         | 0.46                | 1.00                      |
| 8.35  | 90.42     | 2.129                         | 3.42                | 0.99                      |
| 8.61  | 91.70     | 2.122                         | 4.70                | 0.99                      |
| N=12  |           |                               |                     |                           |
| w (%) | $S_r$ (%) | $\rho_d$ (g/cm <sup>3</sup> ) | $S_r - (S_r)_{opt}$ | $\rho_d / (\rho_d)_{max}$ |
| 7.13  | 64.00     | 2.046                         | -22.00              | 0.97                      |
| 7.32  | 65.57     | 2.045                         | -20.43              | 0.97                      |

|              |                          |                               |                                                               |                         |
|--------------|--------------------------|-------------------------------|---------------------------------------------------------------|-------------------------|
| 7.35         | 66.84                    | 2.052                         | -19.16                                                        | 0.97                    |
| 8.33         | 84.28                    | 2.100                         | -1.72                                                         | 1.00                    |
| 9.01         | 90.54                    | 2.097                         | 4.54                                                          | 0.99                    |
| 9.08         | 89.40                    | 2.088                         | 3.40                                                          | 0.99                    |
| 9.36         | 91.33                    | 2.084                         | 5.33                                                          | 0.99                    |
| 9.40         | 88.32                    | 2.067                         | 2.32                                                          | 0.98                    |
| 9.90         | 81.39                    | 2.004                         | -4.61                                                         | 0.95                    |
| N=8          |                          |                               |                                                               |                         |
| <i>w</i> (%) | <i>S<sub>r</sub></i> (%) | $\rho_d$ (g/cm <sup>3</sup> ) | <i>S<sub>r</sub></i> -( <i>S<sub>r</sub></i> ) <sub>opt</sub> | $\rho_d/(\rho_d)_{max}$ |
| 6.93         | 55.04                    | 1.987                         | -30.96                                                        | 0.96                    |
| 7.22         | 57.34                    | 1.987                         | -28.66                                                        | 0.96                    |
| 7.52         | 61.07                    | 1.998                         | -24.93                                                        | 0.97                    |
| 7.89         | 66.35                    | 2.015                         | -19.65                                                        | 0.97                    |
| 8.34         | 72.21                    | 2.029                         | -13.79                                                        | 0.98                    |
| 9.09         | 85.78                    | 2.069                         | -0.22                                                         | 1.00                    |
| 9.36         | 83.48                    | 2.043                         | -2.52                                                         | 0.99                    |
| 9.67         | 84.44                    | 2.033                         | -1.56                                                         | 0.98                    |

25. Lab compaction curves for core material and sieved core material of Miboro dam site

|              |                          |                               |                                                               |                         |
|--------------|--------------------------|-------------------------------|---------------------------------------------------------------|-------------------------|
| 4.0Ec        |                          |                               |                                                               |                         |
| <i>w</i> (%) | <i>S<sub>r</sub></i> (%) | $\rho_d$ (g/cm <sup>3</sup> ) | <i>S<sub>r</sub></i> -( <i>S<sub>r</sub></i> ) <sub>opt</sub> | $\rho_d/(\rho_d)_{max}$ |
| 6.94         | 40.90                    | 1.828                         | -42.10                                                        | 0.92                    |
| 8.46         | 56.06                    | 1.893                         | -26.94                                                        | 0.96                    |
| 9.56         | 68.82                    | 1.937                         | -14.18                                                        | 0.98                    |
| 10.63        | 81.77                    | 1.971                         | -1.23                                                         | 1.00                    |
| 10.91        | 84.26                    | 1.973                         | 1.26                                                          | 1.00                    |
| 12.33        | 89.11                    | 1.939                         | 6.11                                                          | 0.98                    |
| 13.53        | 90.66                    | 1.899                         | 7.66                                                          | 0.96                    |
| 2.4Ec        |                          |                               |                                                               |                         |
| <i>w</i> (%) | <i>S<sub>r</sub></i> (%) | $\rho_d$ (g/cm <sup>3</sup> ) | <i>S<sub>r</sub></i> -( <i>S<sub>r</sub></i> ) <sub>opt</sub> | $\rho_d/(\rho_d)_{max}$ |
| 6.56         | 35.93                    | 1.786                         | -47.07                                                        | 0.93                    |
| 8.44         | 50.27                    | 1.834                         | -32.73                                                        | 0.95                    |
| 9.70         | 62.53                    | 1.878                         | -20.47                                                        | 0.97                    |
| 10.44        | 70.48                    | 1.903                         | -12.52                                                        | 0.99                    |
| 11.82        | 84.77                    | 1.935                         | 1.77                                                          | 1.00                    |
| 11.97        | 85.35                    | 1.932                         | 2.35                                                          | 1.00                    |
| 13.56        | 88.71                    | 1.886                         | 5.71                                                          | 0.98                    |
| 1.6Ec        |                          |                               |                                                               |                         |
| <i>w</i> (%) | <i>S<sub>r</sub></i> (%) | $\rho_d$ (g/cm <sup>3</sup> ) | <i>S<sub>r</sub></i> -( <i>S<sub>r</sub></i> ) <sub>opt</sub> | $\rho_d/(\rho_d)_{max}$ |
| 7.15         | 36.84                    | 1.750                         | -47.16                                                        | 0.92                    |
| 8.97         | 51.04                    | 1.808                         | -32.96                                                        | 0.95                    |
| 10.50        | 64.69                    | 1.853                         | -19.31                                                        | 0.97                    |
| 11.27        | 73.19                    | 1.882                         | -10.81                                                        | 0.99                    |



|         |           |                               |                     |                           |
|---------|-----------|-------------------------------|---------------------|---------------------------|
| 12.32   | 84.58     | 1.912                         | 0.58                | 1.00                      |
| 12.40   | 84.50     | 1.908                         | 0.50                | 1.00                      |
| 13.26   | 86.58     | 1.885                         | 2.58                | 0.99                      |
| 1.0Ec   |           |                               |                     |                           |
| $w$ (%) | $S_r$ (%) | $\rho_d$ (g/cm <sup>3</sup> ) | $S_r - (S_r)_{opt}$ | $\rho_d / (\rho_d)_{max}$ |
| 8.93    | 47.04     | 1.763                         | -36.96              | 0.94                      |
| 10.45   | 57.74     | 1.791                         | -26.26              | 0.95                      |
| 11.20   | 65.20     | 1.821                         | -18.80              | 0.97                      |
| 13.14   | 83.63     | 1.871                         | -0.37               | 1.00                      |
| 13.43   | 85.63     | 1.872                         | 1.63                | 1.00                      |
| 14.45   | 88.55     | 1.850                         | 4.55                | 0.98                      |
| 15.89   | 91.05     | 1.812                         | 7.05                | 0.96                      |
| 0.6Ec   |           |                               |                     |                           |
| $w$ (%) | $S_r$ (%) | $\rho_d$ (g/cm <sup>3</sup> ) | $S_r - (S_r)_{opt}$ | $\rho_d / (\rho_d)_{max}$ |
| 8.95    | 40.75     | 1.675                         | -44.25              | 0.91                      |
| 10.27   | 49.84     | 1.714                         | -35.16              | 0.93                      |
| 12.16   | 65.15     | 1.773                         | -19.85              | 0.96                      |
| 13.05   | 73.62     | 1.803                         | -11.38              | 0.98                      |
| 14.32   | 85.44     | 1.835                         | 0.44                | 1.00                      |
| 14.47   | 85.88     | 1.832                         | 0.88                | 1.00                      |
| 15.91   | 88.82     | 1.797                         | 3.82                | 0.98                      |
